# Supplementary material
Source: Elsevier journal article supplement (https://comptes-rendus.academie-sciences.fr/biologies/article/10.1016/j.crvi.2013.01.004/file/attach/mmc2.pdf)
Supplement: mmc2 [file mmc2.pdf]

Table S1 (continued)

| Clade (species),<br>Individual no.                                                                                 | Nucleotide position |          |          |   |   |   |   |   |   |   |   |   |   |   |   |   |   |   |   |   |   |   |   |   |   |   |   |          |          |          |          |          |          |   |   |   |          |          |          |          |          |          |          |          |   |          |          |          |          |   |          |          |          |   |   |          |          |   |
|--------------------------------------------------------------------------------------------------------------------|---------------------|----------|----------|---|---|---|---|---|---|---|---|---|---|---|---|---|---|---|---|---|---|---|---|---|---|---|---|----------|----------|----------|----------|----------|----------|---|---|---|----------|----------|----------|----------|----------|----------|----------|----------|---|----------|----------|----------|----------|---|----------|----------|----------|---|---|----------|----------|---|
|                                                                                                                    | 2                   | <b>2</b> | <b>3</b> | 3 | 3 | 3 | 3 | 3 | 3 | 3 | 3 | 3 | 3 | 3 | 3 | 3 | 3 | 3 | 3 | 3 | 4 | 4 | 4 | 4 | 4 | 4 | 4 | 4        | 4        | <b>4</b> | <b>4</b> | <b>4</b> | 4        | 4 | 5 | 5 | 5        | 5        | 5        | 5        | <b>5</b> | <b>5</b> | 5        | 5        | 5 | 5        | <b>5</b> | 5        | 5        | 5 | 5        | <b>5</b> | 5        | 6 | 6 | 6        | <b>6</b> |   |
|                                                                                                                    | 9                   | <b>9</b> | <b>1</b> | 1 | 1 | 2 | 2 | 3 | 5 | 5 | 7 | 7 | 7 | 8 | 8 | 8 | 8 | 8 | 9 | 9 | 0 | 0 | 0 | 1 | 1 | 2 | 2 | 5        | 5        | 8        | <b>8</b> | <b>8</b> | <b>9</b> | 9 | 9 | 0 | 1        | 1        | 1        | 1        | <b>2</b> | <b>3</b> | 3        | 3        | 4 | 4        | <b>5</b> | <b>5</b> | 6        | 6 | 7        | <b>8</b> | 9        | 0 | 0 | 0        | <b>1</b> |   |
|                                                                                                                    | 6                   | <b>9</b> | <b>1</b> | 4 | 8 | 6 | 9 | 8 | 6 | 9 | 1 | 7 | 8 | 0 | 3 | 6 | 9 | 2 | 9 | 1 | 4 | 7 | 0 | 9 | 2 | 8 | 5 | 8        | 2        | <b>5</b> | <b>8</b> | <b>1</b> | 4        | 7 | 0 | 2 | 3        | 5        | 8        | <b>7</b> | <b>0</b> | 4        | 9        | 5        | 8 | <b>2</b> | 7        | 0        | 3        | 2 | <b>7</b> | 6        | 2        | 5 | 8 | <b>4</b> |          |   |
| Clade IV (Cluster 4: <i>H. leoparda</i> )                                                                          |                     |          |          |   |   |   |   |   |   |   |   |   |   |   |   |   |   |   |   |   |   |   |   |   |   |   |   |          |          |          |          |          |          |   |   |   |          |          |          |          |          |          |          |          |   |          |          |          |          |   |          |          |          |   |   |          |          |   |
| ir062 (GENBANK JX263403)                                                                                           | A                   | C        | T        | C | C | T | C | T | C | A | C | C | C | G | C | T | A | T | T | G | C | T | T | C | C | C | G | G        | A        | A        | C        | T        | C        | A | C | G | T        | A        | T        | C        | A        | G        | T        | A        | A | C        | A        | T        | C        | T | T        | A        | T        | C | A | T        |          |   |
| ir022                                                                                                              |                     |          |          |   |   |   |   |   |   |   |   |   |   |   |   |   |   |   |   |   |   |   |   |   |   |   |   |          |          |          |          |          |          |   |   |   |          |          |          |          |          |          |          |          |   |          |          |          |          |   |          |          |          |   |   |          |          |   |
| ir077                                                                                                              |                     |          |          |   |   |   |   |   |   |   |   |   |   |   |   |   |   |   |   |   |   |   |   |   |   |   |   |          |          |          |          |          |          |   |   |   |          |          |          |          |          |          |          |          |   |          |          |          |          |   |          |          |          |   |   |          |          |   |
| ir087                                                                                                              |                     |          |          |   |   |   |   |   |   |   |   |   |   |   |   |   |   |   |   |   |   |   |   |   |   |   |   |          |          |          |          |          |          |   |   |   |          |          |          |          |          |          |          |          |   |          |          |          |          |   |          |          |          |   |   |          |          |   |
| ir008                                                                                                              |                     |          |          |   |   |   |   |   |   |   |   |   |   |   |   |   |   |   |   |   |   |   |   |   |   |   |   |          |          |          |          |          |          |   |   |   |          |          |          |          |          |          |          |          |   |          |          |          |          |   |          |          |          |   |   |          |          |   |
| ir032, 034, 046, 059                                                                                               |                     |          |          |   |   |   |   |   |   |   |   |   |   |   |   |   |   |   |   |   |   |   |   |   |   |   |   |          |          |          |          |          |          |   |   |   |          |          |          |          |          |          |          |          |   |          |          |          |          |   |          |          |          |   |   |          |          |   |
| ir060                                                                                                              |                     |          |          |   |   |   |   |   |   |   |   |   |   |   |   |   |   |   |   |   |   |   |   |   |   |   |   |          |          |          |          |          |          |   |   |   |          |          |          |          |          |          |          |          |   |          |          |          |          |   |          |          |          |   |   |          |          |   |
| ir051, 053                                                                                                         |                     |          |          |   |   |   |   |   |   |   |   |   |   |   |   |   |   |   |   |   |   |   |   |   |   |   |   |          |          |          |          |          |          |   |   |   |          |          |          |          |          |          |          |          |   |          |          |          |          |   |          |          |          |   |   |          |          |   |
| ir035                                                                                                              |                     |          |          |   |   |   |   |   |   |   |   |   |   |   |   |   |   |   |   |   |   |   |   |   |   |   |   |          |          |          |          |          |          |   |   |   |          |          |          |          |          |          |          |          |   |          |          |          |          |   |          |          |          |   |   |          |          |   |
| ir057                                                                                                              |                     |          |          |   |   |   |   |   |   |   |   |   |   |   |   |   |   |   |   |   |   |   |   |   |   |   |   |          |          |          |          |          |          |   |   |   |          |          |          |          |          |          |          |          |   |          |          |          |          |   |          |          |          |   |   |          |          |   |
| JF493651, JF493652                                                                                                 |                     |          |          |   |   |   |   |   |   |   |   |   |   |   |   |   |   |   |   |   |   |   |   |   |   |   |   |          |          |          |          |          |          |   |   |   |          |          |          |          |          |          |          |          |   |          |          |          |          |   |          |          |          |   |   |          |          |   |
| ir070                                                                                                              |                     |          |          |   |   |   |   |   |   |   |   |   |   |   |   |   |   |   |   |   |   |   |   |   |   |   |   |          |          |          |          |          |          |   |   |   |          |          |          |          |          |          |          |          |   |          |          |          |          |   |          |          |          |   |   |          |          |   |
| ir071                                                                                                              |                     |          |          |   |   |   |   |   |   |   |   |   |   |   |   |   |   |   |   |   |   |   |   |   |   |   |   |          |          |          |          |          |          |   |   |   |          |          |          |          |          |          |          |          |   |          |          |          |          |   |          |          |          |   |   |          |          |   |
| ir018                                                                                                              |                     |          |          |   |   |   |   |   |   |   |   |   |   |   |   |   |   |   |   |   |   |   |   |   |   |   |   |          |          |          |          |          |          |   |   |   |          |          |          |          |          |          |          |          |   |          |          |          |          |   |          |          |          |   |   |          |          |   |
| ir004, 011, 012, 014, 020, 028,<br>042, 066                                                                        |                     |          |          |   |   |   |   |   |   |   |   |   |   |   |   |   |   |   |   |   |   |   |   |   |   |   |   |          |          |          |          |          |          |   |   |   |          |          |          |          |          |          |          |          |   |          |          |          |          |   |          |          |          |   |   |          |          |   |
| ir010, 015, 021, 023, 033, 050,<br>054, 061, 063, 065, 067, 072, 074,<br>078                                       |                     |          |          |   |   |   |   |   |   |   |   |   |   |   |   |   |   |   |   |   |   |   |   |   |   |   |   |          |          |          |          |          |          |   |   |   |          |          |          |          |          |          |          |          |   |          |          |          |          |   |          |          |          |   |   |          |          |   |
| ir003, 009, 013, 016, 019, 025,<br>027, 030, 031, 039, 040, 041, 058,<br>064, 069, 075                             |                     |          |          |   |   |   |   |   |   |   |   |   |   |   |   |   |   |   |   |   |   |   |   |   |   |   |   |          |          |          |          |          |          |   |   |   |          |          |          |          |          |          |          |          |   |          |          |          |          |   |          |          |          |   |   |          |          |   |
| Clade I (Cluster 1: <i>H. tutul</i> sp. nov.)                                                                      |                     |          |          |   |   |   |   |   |   |   |   |   |   |   |   |   |   |   |   |   |   |   |   |   |   |   |   |          |          |          |          |          |          |   |   |   |          |          |          |          |          |          |          |          |   |          |          |          |          |   |          |          |          |   |   |          |          |   |
| ir024                                                                                                              | ·                   | <b>T</b> | <b>C</b> | · | T | C | T | C | · | · | G | T | · | A | · | · | · | · | · | · | T | C | · | T | · | · | A | ·        | ·        | <b>G</b> | <b>T</b> | <b>C</b> | ·        | C | T | · | ·        | ·        | <b>T</b> | <b>G</b> | ·        | C        | ·        | <b>T</b> | · | ·        | T        | ·        | <b>C</b> | · | ·        | ·        | <b>C</b> |   |   |          |          |   |
| ir037 ir080                                                                                                        | ·                   | <b>T</b> | <b>C</b> | · | T | C | T | C | · | · | G | T | · | A | · | · | · | · | · | · | C | T | · | · | · | A | · | ·        | <b>G</b> | <b>T</b> | <b>C</b> | ·        | C        | T | · | · | ·        | <b>T</b> | <b>G</b> | ·        | C        | ·        | <b>T</b> | ·        | · | T        | ·        | <b>C</b> | ·        | · | ·        | <b>C</b> |          |   |   |          |          |   |
| ir052                                                                                                              | ·                   | <b>T</b> | <b>C</b> | · | T | C | T | C | · | · | G | T | · | A | · | G | · | · | · | · | C | T | · | · | · | A | · | ·        | <b>G</b> | <b>T</b> | <b>C</b> | ·        | C        | T | · | · | ·        | <b>T</b> | <b>G</b> | ·        | C        | ·        | <b>T</b> | ·        | · | T        | ·        | <b>C</b> | ·        | · | ·        | <b>C</b> |          |   |   |          |          |   |
| ir086, 088                                                                                                         | ·                   | <b>T</b> | <b>C</b> | · | T | C | T | C | · | · | G | T | · | A | · | · | · | · | · | T | C | · | T | · | · | · | A | ·        | ·        | <b>G</b> | <b>T</b> | <b>C</b> | ·        | C | T | · | ·        | ·        | <b>T</b> | <b>G</b> | ·        | C        | ·        | <b>T</b> | · | ·        | T        | ·        | <b>C</b> | · | ·        | ·        | <b>C</b> |   |   |          |          |   |
| ir112, 113                                                                                                         | ·                   | <b>T</b> | <b>C</b> | · | T | C | T | C | · | · | G | T | · | A | · | · | · | · | · | T | C | · | T | · | · | · | A | ·        | G        | <b>G</b> | <b>T</b> | <b>C</b> | ·        | C | T | · | ·        | ·        | <b>T</b> | <b>G</b> | ·        | C        | ·        | <b>T</b> | · | ·        | T        | ·        | <b>C</b> | · | ·        | ·        | <b>C</b> |   |   |          |          |   |
| zan6                                                                                                               | C                   | <b>T</b> | <b>C</b> | · | T | C | T | C | · | · | G | T | · | A | · | · | · | · | · | C | T | · | · | · | A | · | · | <b>G</b> | <b>T</b> | <b>C</b> | ·        | T        | T        | · | · | · | <b>T</b> | <b>G</b> | ·        | C        | ·        | <b>T</b> | ·        | C        | T | ·        | <b>C</b> | ·        | ·        | · | <b>C</b> |          |          |   |   |          |          |   |
| ir085, 001, 002, 005, 006, 026,<br>029, 043, 044, 045, 047, 049, 055,<br>056, 073, 076, 079, 081, 082, 083,<br>084 | ·                   | <b>T</b> | <b>C</b> | · | T | C | T | C | · | · | G | T | · | A | · | · | · | · | · | C | T | · | · | · | A | · | · | <b>G</b> | <b>T</b> | <b>C</b> | ·        | C        | T        | · | · | · | <b>T</b> | <b>G</b> | ·        | C        | ·        | <b>T</b> | ·        | ·        | T | ·        | <b>C</b> | ·        | ·        | · | <b>C</b> |          |          |   |   |          |          |   |
| Clade III (Cluster 3: <i>H. uarnakë</i> )                                                                          |                     |          |          |   |   |   |   |   |   |   |   |   |   |   |   |   |   |   |   |   |   |   |   |   |   |   |   |          |          |          |          |          |          |   |   |   |          |          |          |          |          |          |          |          |   |          |          |          |          |   |          |          |          |   |   |          |          |   |
| ir094                                                                                                              | ·                   | ·        | ·        | T | · | · | C | T | · | A | T | · | A | T | · | · | · | · | · | C | C | T | T | T | A | · | · | ·        | T        | ·        | T        | G        | ·        | A | C | · | ·        | ·        | ·        | ·        | ·        | ·        | ·        | ·        | · | ·        | ·        | ·        | T        | · | ·        | ·        |          |   |   |          |          |   |
| ir100 ir102 ir103 ir106 ir108                                                                                      | ·                   | ·        | ·        | T | · | · | C | T | · | G | T | · | A | T | · | · | · | · | · | C | C | T | T | T | A | · | · | ·        | T        | ·        | T        | G        | ·        | A | C | · | ·        | ·        | ·        | ·        | ·        | ·        | ·        | ·        | · | ·        | ·        | ·        | ·        | · | T        | ·        | ·        | · |   |          |          |   |
| ir107 ir109                                                                                                        | ·                   | ·        | ·        | T | · | · | C | T | · | G | T | · | A | T | · | · | · | · | · | C | C | T | T | T | A | · | · | ·        | T        | ·        | T        | G        | ·        | A | C | · | ·        | ·        | ·        | ·        | ·        | ·        | ·        | ·        | · | ·        | ·        | ·        | ·        | · | ·        | T        | ·        | · | · |          |          |   |
| JQ929047                                                                                                           | ·                   | ·        | ·        | T | C | · | C | T | G | G | T | · | A | T | · | · | C | · | · | · | C | C | T | T | T | A | · | ·        | ·        | T        | ·        | T        | ·        | A | C | · | ·        | ·        | C        | ·        | ·        | G        | ·        | C        | · | ·        | ·        | ·        | ·        | · | ·        | ·        | ·        | · |   |          |          |   |
| wjc637, ir101, 104, 105, 110, 111                                                                                  | ·                   | ·        | ·        | T | · | · | C | T | · | G | T | · | A | T | C | · | · | · | · | · | C | C | T | T | T | A | · | ·        | ·        | T        | ·        | T        | G        | · | A | C | ·        | ·        | ·        | ·        | ·        | ·        | ·        | ·        | · | ·        | ·        | ·        | ·        | · | ·        | ·        | ·        | · | · | ·        | ·        |   |
| ir089, 090, 091, 092, 093, 095,<br>096, 097, 098, 099                                                              | ·                   | ·        | ·        | T | · | · | C | T | · | G | T | · | A | T | C | · | · | · | · | · | C | C | T | T | T | A | · | ·        | ·        | T        | ·        | T        | G        | · | A | C | ·        | ·        | ·        | ·        | ·        | ·        | ·        | ·        | · | ·        | ·        | ·        | ·        | · | ·        | ·        | ·        | · | · | ·        | ·        | · |
| Clade II (Cluster 2: <i>H. undulata</i> )                                                                          |                     |          |          |   |   |   |   |   |   |   |   |   |   |   |   |   |   |   |   |   |   |   |   |   |   |   |   |          |          |          |          |          |          |   |   |   |          |          |          |          |          |          |          |          |   |          |          |          |          |   |          |          |          |   |   |          |          |   |
| DQ108167                                                                                                           | ·                   | ·        | ·        | T | C | · | C | T | G | A | T | T | A | T | · | G | · | · | · | · | T | T | T | A | A | · | · | T        | ·        | T        | ·        | T        | A        | C | G | · | ·        | ·        | ·        | ·        | G        | ·        | G        | ·        | · | ·        | ·        | ·        | C        | · | G        | ·        | ·        | · |   |          |          |   |
| ir007                                                                                                              | ·                   | ·        | ·        | T | C | · | C | T | G | A | T | T | A | T | · | G | · | · | · | · | T | T | T | A | A | · | · | T        | ·        | T        | ·        | T        | A        | C | G | · | ·        | ·        | ·        | ·        | G        | ·        | G        | C        | · | ·        | ·        | ·        | C        | · | ·        | ·        | ·        | · | · |          |          |   |
